# Supplementary material for: Understanding Vietnamese Farmers’ Perception toward Forest Importance and Perceived Willingness-to-Participate in REDD+ Program: A Case Study in Nghe An Province
Source: MDPI journal article supplement (doi:10.3390/f12050521), 2021-04-23
Supplement: s1 [file s1]

## Supplementary Table

Table S1. Awareness and status of forest exploited in Chau Thai, Nghe An

| Farmers' perceptions, actions and perceived willingness-to-involve REDD+ program |                                     | N      | Mean | Std. Deviation | Std. Error | Min  | 95% Confidence Interval for Mean |             | Max   | Range |
|----------------------------------------------------------------------------------|-------------------------------------|--------|------|----------------|------------|------|----------------------------------|-------------|-------|-------|
|                                                                                  |                                     |        |      |                |            |      | Lower Bound                      | Upper Bound |       |       |
| Forest                                                                           | Importance forest                   | 215.00 | 4.69 | 0.54           | 0.04       | 3.00 | 4.62                             | 4.77        | 5.00  | 2.00  |
|                                                                                  | Total land area (ha)                | 215.00 | 3.15 | 2.86           | 0.20       | 0.11 | 2.77                             | 3.54        | 12.45 | 12.34 |
| Household's land area structure                                                  | Wet rice land area (ha)             | 215.00 | 0.09 | 0.06           | 0.00       | 0.00 | 0.09                             | 0.10        | 0.44  | 0.44  |
|                                                                                  | Paddy land area (ha)                | 215.00 | 0.01 | 0.15           | 0.01       | 0.00 | -0.01                            | 0.03        | 2.00  | 2.00  |
|                                                                                  | Shifting cultivation land area (ha) | 215.00 | 0.01 | 0.10           | 0.01       | 0.00 | 0.00                             | 0.02        | 1.00  | 1.00  |
|                                                                                  | Garden land area (ha)               | 215.00 | 0.01 | 0.03           | 0.00       | 0.00 | 0.01                             | 0.02        | 0.23  | 0.23  |
|                                                                                  | Forest land area (ha)               | 215.00 | 2.94 | 2.80           | 0.19       | 0.03 | 2.57                             | 3.32        | 12.00 | 11.97 |
|                                                                                  | Pond land area (ha)                 | 215.00 | 0.02 | 0.07           | 0.01       | 0.00 | 0.01                             | 0.03        | 1.00  | 1.00  |
|                                                                                  | Residential land area (ha)          | 215.00 | 0.05 | 0.08           | 0.01       | 0.00 | 0.04                             | 0.06        | 1.00  | 1.00  |
|                                                                                  | Other land area ha                  | 215.00 | 0.01 | 0.14           | 0.01       | 0.00 | -0.01                            | 0.03        | 2.00  | 2.00  |
| Reasons to plant forest species                                                  | Easy to cultivate                   | 215.00 | 0.98 | 0.14           | 0.01       | 0.00 | 0.96                             | 1.00        | 1.00  | 1.00  |
|                                                                                  | Few pests                           | 215.00 | 0.68 | 0.47           | 0.03       | 0.00 | 0.62                             | 0.74        | 1.00  | 1.00  |
|                                                                                  | Fast growth                         | 215.00 | 0.67 | 0.47           | 0.03       | 0.00 | 0.61                             | 0.73        | 1.00  | 1.00  |
|                                                                                  | Short harvesting time               | 215.00 | 0.13 | 0.34           | 0.02       | 0.00 | 0.09                             | 0.18        | 1.00  | 1.00  |
|                                                                                  | Easy to sell                        | 215.00 | 0.62 | 0.49           | 0.03       | 0.00 | 0.55                             | 0.68        | 1.00  | 1.00  |

|                            |                                      |        |       |       |      |      |       |       |        |        |
|----------------------------|--------------------------------------|--------|-------|-------|------|------|-------|-------|--------|--------|
|                            | Economic efficiency                  | 215.00 | 0.45  | 0.50  | 0.03 | 0.00 | 0.38  | 0.52  | 1.00   | 1.00   |
|                            | Environmental protection             | 215.00 | 0.33  | 0.47  | 0.03 | 0.00 | 0.27  | 0.40  | 1.00   | 1.00   |
|                            | Native species favoured              | 215.00 | 0.09  | 0.28  | 0.02 | 0.00 | 0.05  | 0.13  | 1.00   | 1.00   |
|                            | Weather resistance                   | 215.00 | 0.33  | 0.47  | 0.03 | 0.00 | 0.27  | 0.40  | 1.00   | 1.00   |
|                            | Seedlings and technical availability | 215.00 | 0.19  | 0.39  | 0.03 | 0.00 | 0.14  | 0.24  | 1.00   | 1.00   |
|                            | Learn from neighbors                 | 215.00 | 0.77  | 0.42  | 0.03 | 0.00 | 0.72  | 0.83  | 1.00   | 1.00   |
|                            | No other choice seed                 | 215.00 | 0.27  | 0.44  | 0.03 | 0.00 | 0.21  | 0.33  | 1.00   | 1.00   |
|                            | Suggested by the extension officers  | 215.00 | 0.20  | 0.40  | 0.03 | 0.00 | 0.15  | 0.26  | 1.00   | 1.00   |
| Household income structure | Total income (US\$)                  | 215.00 | 68.00 | 39.99 | 2.73 | 8.63 | 62.63 | 73.38 | 212.84 | 204.21 |
|                            | Income from rice (US\$)              | 215.00 | 5.03  | 3.36  | 0.23 | 0.00 | 4.58  | 5.48  | 21.60  | 21.60  |
|                            | Income from corn (US\$)              | 215.00 | 0.04  | 0.30  | 0.02 | 0.00 | 0.00  | 0.08  | 3.60   | 3.60   |
|                            | Income from potato (US\$)            | 215.00 | 0.02  | 0.19  | 0.01 | 0.00 | -0.01 | 0.05  | 2.40   | 2.40   |
|                            | Income from cassava (US\$)           | 215.00 | 0.03  | 0.28  | 0.02 | 0.00 | -0.01 | 0.06  | 4.00   | 4.00   |
|                            | Income from soybean (US\$)           | 215.00 | 0.05  | 0.49  | 0.03 | 0.00 | -0.02 | 0.11  | 6.00   | 6.00   |
|                            | Income from fruit (US\$)             | 215.00 | 0.98  | 6.01  | 0.41 | 0.00 | 0.17  | 1.79  | 73.00  | 73.00  |
|                            | Income from livestock (US\$)         | 215.00 | 17.24 | 17.55 | 1.20 | 0.00 | 14.88 | 19.60 | 112.50 | 112.50 |
|                            | Income from seafood (US\$)           | 215.00 | 0.44  | 1.48  | 0.10 | 0.00 | 0.24  | 0.64  | 10.50  | 10.50  |
|                            | Income from planted forest (US\$)    | 215.00 | 14.67 | 15.18 | 1.04 | 0.00 | 12.63 | 16.71 | 83.33  | 83.33  |

|                                               |                                               |        |       |       |      |      |       |       |        |        |
|-----------------------------------------------|-----------------------------------------------|--------|-------|-------|------|------|-------|-------|--------|--------|
|                                               | Income from non-timber forest products (US\$) | 215.00 | 0.03  | 0.41  | 0.03 | 0.00 | -0.03 | 0.08  | 6.00   | 6.00   |
|                                               | Income from wage earning (US\$)               | 215.00 | 26.55 | 29.84 | 2.04 | 0.00 | 22.53 | 30.56 | 144.00 | 144.00 |
|                                               | Income from doing business (US\$)             | 215.00 | 0.85  | 5.98  | 0.41 | 0.00 | 0.05  | 1.65  | 72.00  | 72.00  |
|                                               | Income from official salary (US\$)            | 215.00 | 1.01  | 7.40  | 0.50 | 0.00 | 0.02  | 2.01  | 96.00  | 96.00  |
|                                               | Income from pension (US\$)                    | 215.00 | 1.08  | 7.06  | 0.48 | 0.00 | 0.13  | 2.03  | 78.00  | 78.00  |
| Potential participation in the REDD + project | REDD+_join_500k<br>(1=yes, 0=no)              | 215.00 | 0.20  | 0.40  | 0.03 | 0.00 | 0.14  | 0.25  | 1.00   | 1.00   |
|                                               | REDD+_join_1000k<br>(1=yes, 0=no)             | 215.00 | 0.41  | 0.49  | 0.03 | 0.00 | 0.34  | 0.48  | 1.00   | 1.00   |
|                                               | REDD+_join_2000k<br>(1=yes, 0=no)             | 215.00 | 0.52  | 0.50  | 0.03 | 0.00 | 0.45  | 0.58  | 1.00   | 1.00   |

Data sources: field survey, personal calculation & [1–3]

**Table S2.** Differences in awareness and forest exploited between poor and non-poor households in Chau Thai, Nghe An

| Farmers' perceptions, actions and perceived willingness-to-involve REDD+ program |                                     | Levene's Test for Equality of Variances |      | t-test for Equality of Means |        |                |                 |                       |                                           |       |
|----------------------------------------------------------------------------------|-------------------------------------|-----------------------------------------|------|------------------------------|--------|----------------|-----------------|-----------------------|-------------------------------------------|-------|
|                                                                                  |                                     | F                                       | Sig. | t                            | df     | Sig.(2-tailed) | Mean difference | Std. Error Difference | 95% Confidence Interval of the Difference |       |
|                                                                                  |                                     |                                         |      |                              |        |                |                 |                       | Lower                                     | Upper |
| Forest                                                                           | Importance forest                   | 4.64                                    | 0.03 | -1.23                        | 161.70 | 0.22           | -0.09           | 0.07                  | -0.24                                     | 0.06  |
| Household's land area structure                                                  | Total land area (ha)                | 18.46                                   | 0.00 | 4.52                         | 199.82 | 0.00           | 1.59            | 0.35                  | 0.90                                      | 2.28  |
|                                                                                  | Wet rice land area (ha)             | 0.01                                    | 0.93 | 0.37                         | 213.00 | 0.71           | 0.00            | 0.01                  | -0.01                                     | 0.02  |
|                                                                                  | Paddy land area (ha)                | 3.54                                    | 0.06 | 0.93                         | 213.00 | 0.35           | 0.02            | 0.02                  | -0.02                                     | 0.06  |
|                                                                                  | Shifting cultivation land area (ha) | 2.44                                    | 0.12 | 0.77                         | 213.00 | 0.44           | 0.01            | 0.01                  | -0.02                                     | 0.04  |
|                                                                                  | Garden land area (ha)               | 0.79                                    | 0.37 | 0.53                         | 213.00 | 0.60           | 0.00            | 0.01                  | -0.01                                     | 0.01  |
|                                                                                  | Forest land area (ha)               | 16.82                                   | 0.00 | 4.38                         | 199.34 | 0.00           | 1.51            | 0.34                  | 0.83                                      | 2.19  |
|                                                                                  | Pond land area (ha)                 | 5.17                                    | 0.02 | 1.99                         | 175.15 | 0.05           | 0.02            | 0.01                  | 0.00                                      | 0.03  |
|                                                                                  | Residential land area (ha)          | 1.92                                    | 0.17 | 1.00                         | 213.00 | 0.32           | 0.01            | 0.01                  | -0.01                                     | 0.03  |
|                                                                                  | Other land area (ha)                | 2.11                                    | 0.15 | 0.73                         | 213.00 | 0.47           | 0.01            | 0.02                  | -0.02                                     | 0.05  |
| Reasons to plant forest species                                                  | Easy to cultivate                   | 0.58                                    | 0.45 | -0.38                        | 213.00 | 0.70           | -0.01           | 0.02                  | -0.05                                     | 0.03  |
|                                                                                  | Few pests                           | 4.98                                    | 0.03 | -1.08                        | 153.41 | 0.28           | -0.07           | 0.07                  | -0.20                                     | 0.06  |
|                                                                                  | Fast growth                         | 0.00                                    | 0.95 | -0.03                        | 213.00 | 0.97           | 0.00            | 0.07                  | -0.14                                     | 0.13  |
|                                                                                  | Short harvesting time               | 6.19                                    | 0.01 | 1.28                         | 173.25 | 0.20           | 0.06            | 0.05                  | -0.03                                     | 0.15  |
|                                                                                  | Easy to sell                        | 19.52                                   | 0.00 | -2.10                        | 156.90 | 0.04           | -0.14           | 0.07                  | -0.28                                     | -0.01 |
|                                                                                  | Economic efficiency                 | 1.73                                    | 0.19 | -1.76                        | 213.00 | 0.08           | -0.13           | 0.07                  | -0.27                                     | 0.02  |
|                                                                                  | Environmental protection            | 2.42                                    | 0.12 | 0.74                         | 213.00 | 0.46           | 0.05            | 0.07                  | -0.08                                     | 0.19  |
|                                                                                  | Native species favoured             | 49.83                                   | 0.00 | -2.82                        | 92.82  | 0.01           | -0.14           | 0.05                  | -0.23                                     | -0.04 |
|                                                                                  | Weather resistance                  | 11.11                                   | 0.00 | -1.95                        | 134.43 | 0.05           | -0.14           | 0.07                  | -0.27                                     | 0.00  |

|                            |                                               |       |      |       |        |      |       |      |       |       |
|----------------------------|-----------------------------------------------|-------|------|-------|--------|------|-------|------|-------|-------|
|                            | Seedlings and technical availability          | 32.70 | 0.00 | -2.74 | 113.58 | 0.01 | -0.17 | 0.06 | -0.29 | -0.05 |
|                            | Learn from neighbors                          | 0.19  | 0.66 | -0.22 | 213.00 | 0.83 | -0.01 | 0.06 | -0.13 | 0.11  |
|                            | No other choice seed                          | 4.16  | 0.04 | -1.04 | 135.80 | 0.30 | -0.07 | 0.07 | -0.20 | 0.06  |
|                            | Suggested by the extension officers           | 0.46  | 0.50 | 0.34  | 149.71 | 0.74 | 0.02  | 0.06 | -0.10 | 0.13  |
| Household income structure | Total income (US\$)                           | 23.60 | 0.00 | 12.17 | 205.37 | 0.00 | 46.42 | 3.81 | 38.90 | 53.95 |
|                            | Income from rice (US\$)                       | 1.13  | 0.29 | 0.91  | 213.00 | 0.36 | 0.44  | 0.48 | -0.51 | 1.39  |
|                            | Income from corn (US\$)                       | 3.79  | 0.05 | -0.99 | 213.00 | 0.33 | -0.04 | 0.04 | -0.13 | 0.04  |
|                            | Income from potato (US\$)                     | 0.46  | 0.50 | -0.35 | 213.00 | 0.72 | -0.01 | 0.03 | -0.06 | 0.04  |
|                            | Income from cassava (US\$)                    | 0.76  | 0.38 | 0.43  | 213.00 | 0.67 | 0.02  | 0.04 | -0.06 | 0.10  |
|                            | Income from soybean (US\$)                    | 4.08  | 0.04 | 1.39  | 141.00 | 0.17 | 0.07  | 0.05 | -0.03 | 0.17  |
|                            | Income from fruit (US\$)                      | 7.44  | 0.01 | 2.01  | 150.03 | 0.05 | 1.26  | 0.63 | 0.02  | 2.49  |
|                            | Income from livestock (US\$)                  | 13.34 | 0.00 | 4.31  | 212.97 | 0.00 | 8.74  | 2.03 | 4.74  | 12.74 |
|                            | Income from seafood (US\$)                    | 5.03  | 0.03 | 1.30  | 172.36 | 0.19 | 0.26  | 0.20 | -0.13 | 0.65  |
|                            | Income from planted forest (US\$)             | 23.93 | 0.00 | 4.20  | 212.60 | 0.00 | 7.33  | 1.75 | 3.89  | 10.77 |
|                            | Income from non-timber forest products (US\$) | 2.08  | 0.15 | 0.72  | 213.00 | 0.47 | 0.04  | 0.06 | -0.07 | 0.16  |
|                            | Income from wage earning (US\$)               | 24.90 | 0.00 | 8.39  | 208.17 | 0.00 | 26.24 | 3.13 | 20.08 | 32.40 |
|                            | Income from doing business (US\$)             | 8.50  | 0.00 | 2.02  | 141.56 | 0.05 | 1.24  | 0.62 | 0.03  | 2.46  |
|                            | Income from official salary (US\$)            | 4.41  | 0.04 | 1.41  | 169.25 | 0.16 | 1.12  | 0.79 | -0.44 | 2.68  |
|                            | Income from pension (US\$)                    | 0.24  | 0.62 | -0.28 | 213.00 | 0.78 | -0.29 | 1.02 | -2.30 | 1.72  |
| Potential participation in | REDD+_join_500k (1=yes, 0=no)                 | 36.91 | 0.00 | 3.00  | 195.95 | 0.00 | 0.15  | 0.05 | 0.05  | 0.25  |
|                            | REDD+_join_1000k (1=yes, 0=no)                | 5.87  | 0.02 | 1.15  | 149.57 | 0.25 | 0.08  | 0.07 | -0.06 | 0.22  |

|                    |                                |      |      |      |        |      |      |      |       |      |
|--------------------|--------------------------------|------|------|------|--------|------|------|------|-------|------|
| the REDD + project | REDD+_join_2000k (1-yes, 0-no) | 0.13 | 0.72 | 0.77 | 213.00 | 0.44 | 0.06 | 0.07 | -0.09 | 0.20 |
|--------------------|--------------------------------|------|------|------|--------|------|------|------|-------|------|

Data sources: field survey, personal calculation & [1–3]

Table S3. The poverty line in Vietnam and the World in 2004-2020

| Year      | Vietnam     |           |             |           | World     |
|-----------|-------------|-----------|-------------|-----------|-----------|
|           | Rural       |           | City        |           |           |
|           | VND month-1 | USD day-1 | VND month-1 | USD day-1 | USD day-1 |
| 2004      | 170,000     | 0.38      | 220,000     | 0.49      | 1         |
| 2006      | 200,000     | 0.42      | 260,000     | 0.54      | 1         |
| 2008      | 290,000     | 0.59      | 370,000     | 0.75      | 1.25      |
| 2010      | 360,000     | 0.62      | 450,000     | 0.77      | 1.25      |
| 2011-2015 | 400,000     | 0.57      | 500,000     | 0.71      | 1.25      |
| 2016-2020 | 700,000     | 1.02      | 900,000     | 1.32      | 1.9       |

Note: Data was obtained from <http://www.molisa.gov.vn>; [www.gso.gov.vn](http://www.gso.gov.vn); <https://data.worldbank.org>; <https://www.vietcombank.com.vn>

#### References:

1. Vuong, Q.-H.; Pham, P.; Nguyen, H.; Ngo, T.; Tran, M.; Khuc, Q. V. Farmers' livelihood strategies and perceived constraints from poor and non-poor households: A dataset from a field survey in Nghe An, Vietnam. *Data Br.* **2021**, *36*, 106991, doi:10.1016/j.dib.2021.106991.
2. Van Khuc, Q.; Le, T.A.T.; Nguyen, T.H.; Nong, D.; Tran, B.Q.; Meyfroidt, P.; Tran, T.; Duong, P.B.; Nguyen, T.T.; Tran, T.; et al. Forest cover change, households' livelihoods, trade-offs, and constraints associated with plantation forests in poor upland-rural landscapes: Evidence from north central Vietnam. *Forests* **2020**, *11*, doi:10.3390/F11050548.
3. Khuc, Q. Van *From farmers perceptions of forest importance to perceived willingness-to-involve REDD+ program: A data from household survey in Nghe An province*; Mendeley Data, V1 2021; Elsevier: Amsterdam, The Netherlands, 2021;
